# Supplementary material for: Fear Deficits in Hypomyelinated Tppp Knock-Out Mice
Source: eNeuro. 2020 Sep 23;7(5):ENEURO.0170-20.2020. doi: 10.1523/ENEURO.0170-20.2020 (PMC7540923; doi:10.1523/ENEURO.0170-20.2020)
Supplement: Extended Data Figure 1-1 — Detailed results of statistical analysis in Figure 1. Download Figure 1-1, XLSX file. [file enu-eN-NWR-0170-20-s01.xlsx]

## Sheet: Figure 1-1
Figure 1-1. Detailed results of statistical analysis in Figure 1.
Figure Number	Sample size (n)	2-way ANOVA			Significant values by Sidak Multiple Comparisons		Independent t-tests
		Source of Variation	Difference btw Means	p-value	Block Comparison	p-value	Block	Normal?	p-value, Mann-Whitney	p-value, Welch's t-test
1B	n=5	Time x Genotype		0.8119
		Time		0.0004	0-10 vs. 30-40	0.0261
					0-10 vs. 50-60	0.0121
					10-20 vs. 30-40	0.0342
					10-20 vs. 50-60	0.0422
					20-30 vs. 30-40	0.0252
					20-30 vs. 50-60	0.0105
		Genotype	WT mean = 829.2 KO mean = 818.6 95% CI of difference = -399.1 to 420.2	0.954
1C	n=5	Time x Genotype		0.9769
		Time		0.1151
		Genotype	WT mean = 2.639 KO mean = 2.587 95% CI of difference = -0.1878 to 0.2905	0.668
1D	n=5	Time x Genotype		0.1702			0-10 min	No	0.0159
		Time		0.3016			10-20 min	Yes		0.0712
			WT mean = 77.30				20-30 min	Yes		0.071
		Genotype	KO mean = 29.43 95% CI of difference = -13.77 to 109.5	0.1111
1E	n=5	Time x Genotype		0.365			20-30 min	Yes		0.0504
		Time		0.0697
		Genotype	WT mean = 4.577 KO mean = 4.023 95% CI of difference = -0.7414 to 1.848	0.3945
1F	n=5	Time x Genotype		0.3812			30-40 min	No	0.0794
		Time		0.04	10-20 vs. 50-60	0.0472	40-50 min	Yes		0.1481
		Genotype	WT mean = 5.913 KO mean = 5.557 95% CI of difference = -0.9906 to 1.704	0.597
