# Supplementary material for: Fear Deficits in Hypomyelinated Tppp Knock-Out Mice
Source: eNeuro. 2020 Sep 23;7(5):ENEURO.0170-20.2020. doi: 10.1523/ENEURO.0170-20.2020 (PMC7540923; doi:10.1523/ENEURO.0170-20.2020)
Supplement: Extended Data Figure 1-2 — Power, two-way ANOVAs. Download Figure 1-2, XLSX file. [file enu-eN-NWR-0170-20-s02.xlsx]

## Sheet: Figure 1-2
Figure 1-2. Power, 2-way ANOVAs
Assuming effect size of time as calculated, significance of 0.05, given n. Large effect size of genotype (f=0.4)
Assay	Analysis	Figure	n	Power	Effect size genotype, observed	p-value observed
Open field	Distance	1B	5	0.86	0.003536	0.954
	Velocity	1C	5	0.86	0.1862	0.668
	Vertical activity	1D	5	0.86	3.207	0.1111
	Right rotations	1E	5	0.86	0.7384	0.3945
	Left rotations	1F	5	0.86	0.2833	0.597
Light-dark preference	Light preference	2B	5	0.86	0.5072	0.4966
Fear conditioning	Training	3B	11	0.99999	2.2	0.1536
	Altered context	3D	11	0.99999	105.7	<0.0001
	Altered context total	3E	11	0.99999	13.65	0.0014
Pupil dilation	Pupil dilation	6B	6	0.9974	3.69	0.837
