# Supplementary material for: Fear Deficits in Hypomyelinated Tppp Knock-Out Mice
Source: eNeuro. 2020 Sep 23;7(5):ENEURO.0170-20.2020. doi: 10.1523/ENEURO.0170-20.2020 (PMC7540923; doi:10.1523/ENEURO.0170-20.2020)
Supplement: Extended Data Figure 4-1 — Detailed results of statistical analysis in Figure 4. Download Figure 4-1, XLSX file. [file enu-eN-NWR-0170-20-s06.xlsx]

## Sheet: Figure 4-1
FIgure 4-1. Detailed results of statistical analysis in Figure 4.
Figure Number	Sample size (n)	Normal?	Welch's unpaired 2-tailed t-test	Mann-Whitney test
4B	n=8	Yes	WT mean = 19.63 KO mean = 20.13 Difference between means = 0.5000 ± 2.594 p=0.8507
4C	n=8	No		WT median = 67.54% KO median = 50.00% Difference = -17.54% p=0.0009
